# Supplementary material
Source: PubMed Central journal article supplement (PMC3237388)

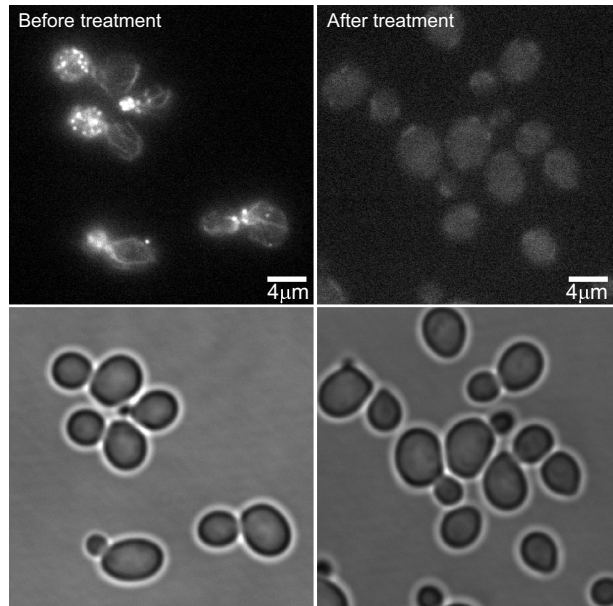

## Figure S2

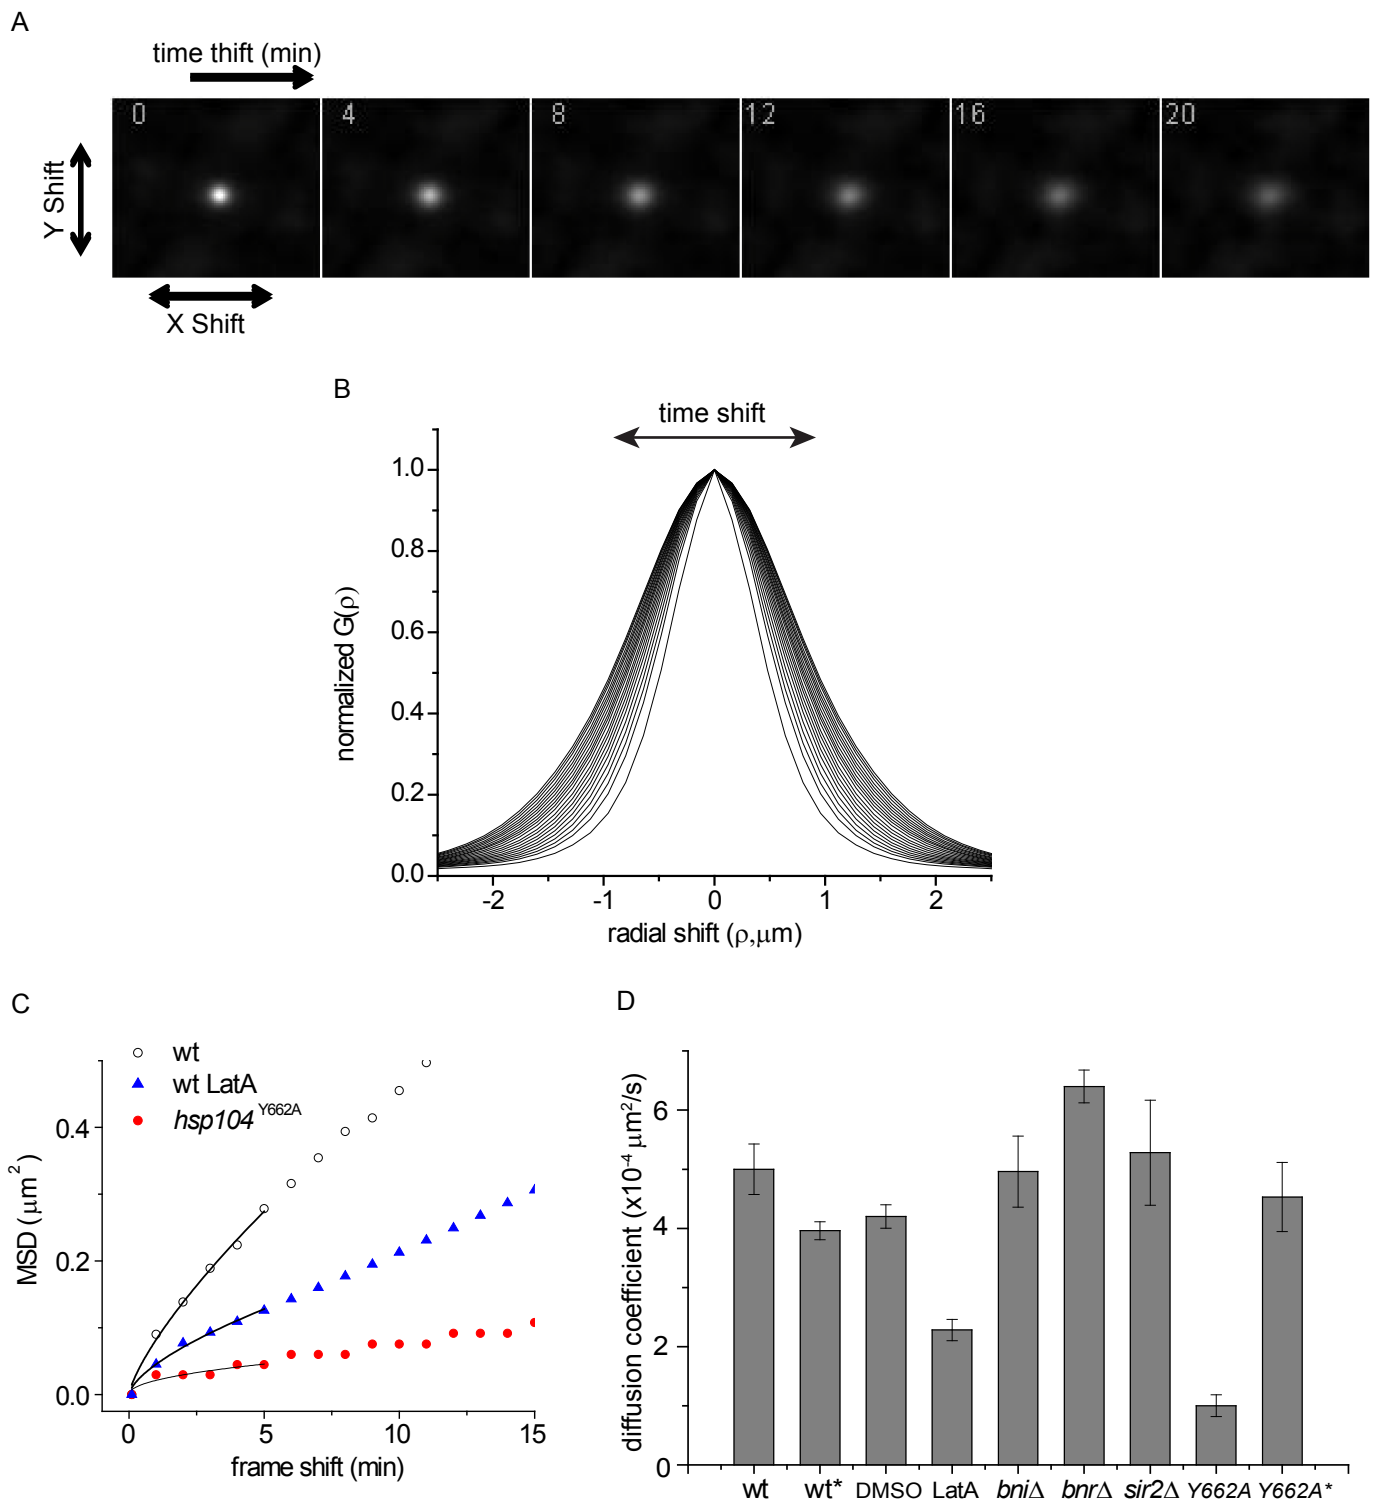

Supplement: NIHMS337164-supplement-07.pdf [file NIHMS337164-supplement-07.pdf]
